# Supplementary material for: Heimaeyite, Na3Al(SO4)3, a new mineral from the fumaroles on Eldfell volcano, Iceland
Source: Copernicus journal article supplement (doi:10.5194/ejm-37-79-2025), 2025-02-13
Supplement: Supplementary file 1 [file ejm-37-79-2025-supplement.zip]

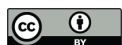

*Supplement of*

## **Heimaeyite, $\text{Na}_3\text{Al}(\text{SO}_4)_3$ , a new mineral from the fumaroles on Eldfell volcano, Iceland**

**Tonči Balić-Žunić et al.**

*Correspondence to:* Tonči Balić-Žunić (toncib@ign.ku.dk)

- [ejm-37-79-2025-supplement-title-page.pdf](#)
- [Supplementary heimaeyite.cif](#)

The copyright of individual parts of the supplement might differ from the article licence.
